# Supplementary material
Source: PubMed Central journal article supplement (PMC3267956)
Supplement: pro0020-1929-SD1.pdf [file pro0020-1929-SD1.pdf]

|             |     |                                                              |     |
|-------------|-----|--------------------------------------------------------------|-----|
| p_1xiza_006 | 1   | VSQNDIIKALASPLINDGMVVSDFADHVITREQNAPTGLPVEPVGVAIPHTDSKYVRQNA | 60  |
|             |     | VSQNDIIKALASPLINDGMVVSDFADHVITREQN PTGLPVEPVGVAIPHTD KYVRQNA |     |
| 1xiz        | 20  | VSQNDIIKALASPLINDGMVVSDFADHVITREQNFPTGLPVEPVGVAIPHTDHKYVRQNA | 79  |
|             |     |                                                              |     |
| p_1xiza_006 | 61  | ISVGILAEPVNFED-AGAPDPVPRVVFMLALGNWFDITNVLWIMDVIQDADFMQQLLV   | 119 |
|             |     | ISVGILAEPVNFED G PDPVPRVVFMLALG NVL WIMDVIQD DFMQQLLV        |     |
| 1xiz        | 80  | ISVGILAEPVNFEDMGGEPPDPVPRVVFMLALGESNKQLNVLGWIMDVIQDEDFMQQLLV | 139 |
|             |     |                                                              |     |
| p_1xiza_006 | 118 | MNDDEIYQSIYTRISE                                             | 135 |
|             |     | MNDDEIYQSIYTRISE                                             |     |
| 1xiz        | 140 | MNDDEIYQSIYTRISE                                             | 155 |
|             |     |                                                              |     |
| p_1xiza_006 | 138 | GMAGIHFRRHYVRHLP                                             | 153 |
|             |     | M IHFRRHYVRHLP                                               |     |
| 1xiz        | 2   | AMQDIHFRRHYVRHLP                                             | 17  |

Figure S1. As expected the naturally occurring 1xiz sequence was identified by Blast as a homologue of the permuted variant. The resulting sequence alignment shows the N-terminus of the permuted variant matched to the C-terminus of 1xiz and the C-terminus of the permuted variant matched to the N-terminus of 1xiz. Similar sequence alignments were observed for the multiple homologues of 1xiz, but no full alignments to the contiguous sequence of the permuted variant were found.
